# Supplementary material for: A Rapid RPA-CRISPR/Cas12a Detection Method for Adulteration of Goat Milk Powder
Source: MDPI journal article supplement (doi:10.3390/foods12081569), 2023-04-07
Supplement: s1 [file s1]

**Table S1.** Comparison of RPA-CRISPR/Cas12a and qPCR method for Real sample testing.

| ID | Real-time PCR assay |                |                | RPA-CRISPR/Cas12a assay | ID | Real-time PCR assay |         |                | RPA-CRISPR/Cas12a assay |
|----|---------------------|----------------|----------------|-------------------------|----|---------------------|---------|----------------|-------------------------|
|    | Target              | Mean Ct        | Result         |                         |    | Target              | Mean Ct | Result         |                         |
| 1  | Cattle              | * <sub>a</sub> | — <sub>b</sub> | —                       | 19 | Cattle              | 34.22   | + <sub>c</sub> | +                       |
|    | Control             | 27.58          |                |                         |    | Control             | 34.87   |                |                         |
| 2  | Cattle              | 29.71          | +              | +                       | 20 | Cattle              | 28.63   | +              | +                       |
|    | Control             | 25.08          |                |                         |    | Control             | 28.47   |                |                         |
| 3  | Cattle              | 29.27          | +              | +                       | 21 | Cattle              | *       | —              | —                       |
|    | Control             | 26.99          |                |                         |    | Control             | 29.70   |                |                         |
| 4  | Cattle              | 30.68          | +              | +                       | 22 | Cattle              | *       | —              | —                       |
|    | Control             | 27.01          |                |                         |    | Control             | 28.92   |                |                         |
| 5  | Cattle              | *              | —              | —                       | 23 | Cattle              | *       | —              | —                       |
|    | Control             | 26.08          |                |                         |    | Control             | 27.03   |                |                         |
| 6  | Cattle              | *              | —              | —                       | 24 | Cattle              | *       | —              | —                       |
|    | Control             | 24.72          |                |                         |    | Control             | 29.26   |                |                         |
| 7  | Cattle              | *              | —              | —                       | 25 | Cattle              | *       | —              | —                       |
|    | Control             | 32.28          |                |                         |    | Control             | 23.44   |                |                         |
| 8  | Cattle              | *              | —              | —                       | 26 | Cattle              | *       | —              | —                       |
|    | Control             | 27.75          |                |                         |    | Control             | 28.96   |                |                         |
| 9  | Cattle              | *              | —              | —                       | 27 | Cattle              | *       | —              | —                       |
|    | Control             | 27.03          |                |                         |    | Control             | 27.66   |                |                         |
| 10 | Cattle              | 32.03          | +              | +                       | 28 | Cattle              | *       | —              | —                       |
|    | Control             | 26.37          |                |                         |    | Control             | 29.38   |                |                         |
| 11 | Cattle              | 30.86          | +              | +                       | 29 | Cattle              | *       | —              | —                       |
|    | Control             | 25.81          |                |                         |    | Control             | 27.53   |                |                         |
| 12 | Cattle              | *              | —              | —                       | 30 | Cattle              | *       | —              | —                       |
|    | Control             | 33.80          |                |                         |    | Control             | 36.43   |                |                         |
| 13 | Cattle              | *              | —              | —                       | 31 | Cattle              | *       | —              | —                       |
|    | Control             | 25.35          |                |                         |    | Control             | 29.76   |                |                         |
| 14 | Cattle              | 29.44          | +              | +                       | 32 | Cattle              | *       | —              | —                       |
|    | Control             | 26.57          |                |                         |    | Control             | 28.69   |                |                         |
| 15 | Cattle              | *              | —              | —                       | 33 | Cattle              | *       | —              | —                       |
|    | Control             | 31.69          |                |                         |    | Control             | 32.93   |                |                         |
| 16 | Cattle              | *              | —              | —                       | 34 | Cattle              | *       | —              | —                       |
|    | Control             | 23.47          |                |                         |    | Control             | 29.98   |                |                         |
| 17 | Cattle              | *              | —              | —                       | 35 | Cattle              | *       | —              | —                       |
|    | Control             | 28.94          |                |                         |    | Control             | 31.67   |                |                         |
| 18 | Cattle              | 29.23          | +              | +                       | 36 | Cattle              | *       | —              | —                       |
|    | Control             | 32.04          |                |                         |    | Control             | 27.42   |                |                         |

Continue

|    |         |       |   |   |        |         |       |   |   |
|----|---------|-------|---|---|--------|---------|-------|---|---|
| 37 | Cattle  | *     | — | — | 48     | Cattle  | *     | — | — |
|    | Control | 27.99 |   |   |        | Control | 30.63 |   |   |
| 38 | Cattle  | *     | — | — | 49     | Cattle  | *     | — | — |
|    | Control | 32.77 |   |   |        | Control | 30.22 |   |   |
| 39 | Cattle  | *     | — | — | 50     | Cattle  | *     | — | — |
|    | Control | 26.97 |   |   |        | Control | *     |   |   |
| 40 | Cattle  | *     | — | — | 51     | Cattle  | *     | — | — |
|    | Control | 30.55 |   |   |        | Control | 30.86 |   |   |
| 41 | Cattle  | *     | — | — | 52     | Cattle  | 34.85 | + | + |
|    | Control | 23.29 |   |   |        | Control | 35.05 |   |   |
| 42 | Cattle  | *     | — | — | 53     | Cattle  | *     | — | — |
|    | Control | 28.60 |   |   |        | Control | 31.60 |   |   |
| 43 | Cattle  | 33.64 | + | + | 54     | Cattle  | 30.20 | + | + |
|    | Control | 34.47 |   |   |        | Control | 27.65 |   |   |
| 44 | Cattle  | 34.63 | + | + | 55     | Cattle  | *     | — | — |
|    | Control | 34.42 |   |   |        | Control | 28.35 |   |   |
| 45 | Cattle  | 33.01 | + | + | 55     | Cattle  | *     | — | — |
|    | Control | 33.20 |   |   |        | Control | 28.35 |   |   |
| 46 | Cattle  | 34.69 | + | + | Cattle | Cattle  | 32.09 | + | + |
|    | Control | 35.60 |   |   |        | Control | 32.28 |   |   |
| 47 | Cattle  | *     | — | — | NTC    | Cattle  | *     | — | — |
|    | Control | *     |   |   |        | Control | *     |   |   |

a (\*): Mean Ct > 40.

b (—): Negative for cattle-derived ingredient.

c (+): Positive for cattle-derived ingredient.

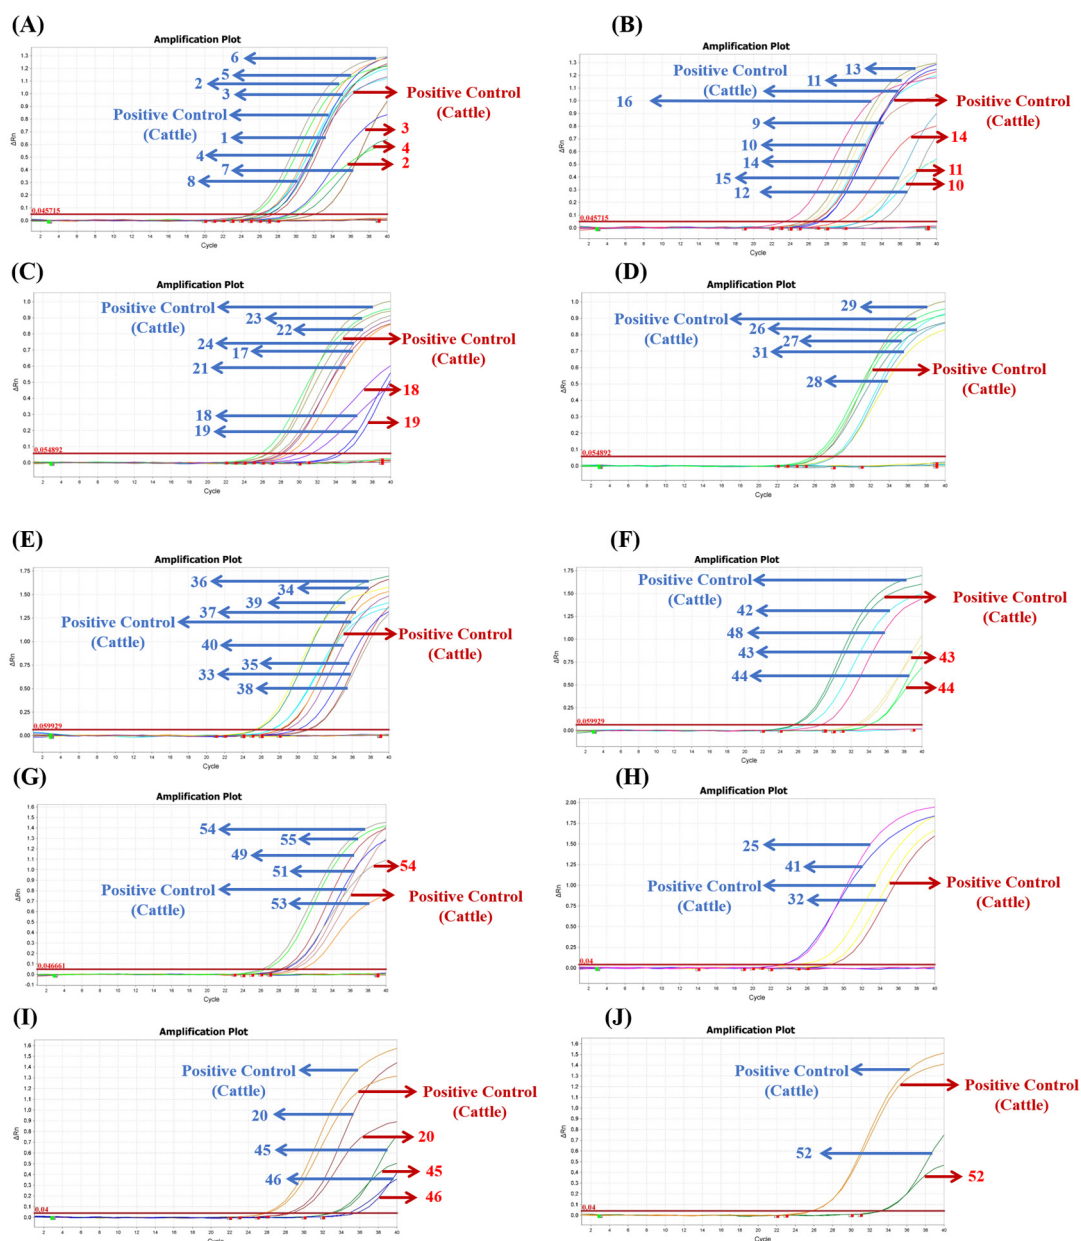

**Figure S1.** The results of cattle-derived ingredient in 55 goat milk powder products tested by qPCR method.
